# Supplementary material for: Iron Status of Burkinabé Adolescent Girls Predicts Malaria Risk in the Following Rainy Season
Source: PubMed Central journal article supplement (PMC7284973; doi:10.3390/nu12051446), 2020-05-16
Supplement: nutrients-12-01446-s001.pdf [file nutrients-12-01446-s001.pdf]

**SUPPLEMENTARY FILE 1**  
**ADDITIONAL ANALYSES**

Tables showing regression slopes for:

**Figure 3 (Supplementary Table S1)** Menarche effects for iron biomarkers

**Figure 4 (Supplementary Table S2)** Menarche effects for RDT and malaria parasitaemia

**Figure 5 (Supplementary Table S3)** Menarche effects (menarcheal - non menarcheal) for parasite prevalence by standardised iron biomarker levels

CONSORT Checklist

**Supplementary Table S1: Regression slopes and menarche effects (menarcheal - non menarcheal) for iron biomarkers (Figure 3).**

| Iron Biomarker                    | Slope (per year) (95%CI) | Menarche effect (95%CI) |
|-----------------------------------|--------------------------|-------------------------|
| log(adjusted ferritin) (%)        | -6.0 (-8.8 - -3.2)       | -6.9 (-21.9 - 8.1)      |
| log(sTfR/log ferritin) (%)        | 2.4 (0.7 - 4.0)          | -0.4 (-9.1 - 8.44)      |
| log(hepcidin) (%)                 | -8.3 (-12.2 - -4.3)      | -20.9 (-41.7 - -0.1)    |
| Adjusted body iron stores (mg/kg) | -0.22 (-0.34 - -0.10)    | -0.23 (-0.87 - 0.41)    |

Log-transformed variable slopes are expressed as %/year.

**Supplementary Table S2: Regression slopes and menarche effects (menarcheal - non menarcheal) for RDT and malaria parasitaemia (Figure 4).**

| Parameter                   | Slope (95%CI)      | Menarche effect (95%CI) |
|-----------------------------|--------------------|-------------------------|
| RDT by age                  | 0.90 (0.84 - 0.96) | 1.27 (0.89 - 1.83)      |
| Parasitaemia by age         | 0.88 (0.82 - 0.95) | 0.79 (0.56 - 1.14)      |
| RDT by BMI Z-score          | 0.88 (0.74 - 1.05) | 1.33 (0.90 - 1.96)      |
| Parasitaemia by BMI Z-score | 0.95 (0.80 - 1.13) | 0.77 (0.52 - 1.13)      |

Slopes are expressed as odds ratios per year or BMI Z-score (per SD)

**Supplementary Table S3: Regression slopes and menarche effects (menarcheal - non menarcheal) for parasite prevalence by standardised iron biomarker levels (Figure 5).**

| Iron Biomarker         | Slope (per SD) (95%CI) | Menarche effect (95%CI) |
|------------------------|------------------------|-------------------------|
| log(ferritin)          | 1.53 (1.11 - 2.11)     | 0.68 (0.48 - 0.97)      |
| log(sTfR/log ferritin) | 0.42 (0.23 - 0.76)     | 0.67 (0.48 - 0.95)      |
| log(hepcidin)          | 1.23 (0.98 - 1.55)     | 0.68 (0.48 - 0.97)      |
| Body iron (mg/kg)      | 1.05 (1.02 - 1.09)     | 0.68 (0.48 - 0.97)      |

Slopes are expressed as odds ratios per standard deviation of sample distribution.

## CONSORT CHECKLIST

| PAPER SECTION<br>Topic      | Item | Description                                                                                   | Reported<br>Page(s) /Table or<br>Figure         |
|-----------------------------|------|-----------------------------------------------------------------------------------------------|-------------------------------------------------|
| TITLE                       | 1a   | Iron status of Burkinabé adolescent girls predicts malaria risk in the following rainy season | 1                                               |
| ABSTRACT                    | 1b   | Unstructured                                                                                  | 1                                               |
| INTRODUCTION                | 2a   | Scientific background and explanation of rationale                                            | 2                                               |
|                             | 2b   | Specific objectives                                                                           | 2                                               |
| METHODS<br>Design           | 3a   | Trial design                                                                                  | 3; Ref 7                                        |
|                             | 3b   | Changes to trial design                                                                       | N/A                                             |
| Participants                | 4a   | Eligibility                                                                                   | 3                                               |
|                             | 4b   | Study setting                                                                                 | 3                                               |
| Interventions               | 5    | Description                                                                                   | 3                                               |
| Outcomes                    | 6a   | Pre-specified                                                                                 | 4                                               |
|                             | 6b   | Changes to trial outcomes                                                                     | 5                                               |
| Sample Size                 | 7a   | Sample size determination                                                                     | 4                                               |
|                             | 7b   | Interim analyses                                                                              | Results 6-12                                    |
| Randomisation               | 8a   | Sequence generation                                                                           | Ref 7                                           |
|                             | 8b   | Type                                                                                          |                                                 |
|                             | 9    | Allocation concealment mechanism                                                              | Ref 7                                           |
|                             | 10   | Implementation                                                                                | Ref 7                                           |
| Blinding                    | 11a  | Who and how blinded                                                                           | Ref 7                                           |
|                             | 11b  | Similarity of the interventions                                                               | Ref 7                                           |
| Statistical methods         | 12a  | Main outcomes                                                                                 | 5                                               |
|                             | 12b  | Sub-group analyses                                                                            | Tables 1-4<br>Figures 2-5<br>Suppl tables S1-S3 |
| RESULTS<br>Participants     | 13a  | Participant flow diagram                                                                      | 7                                               |
|                             | 13b  | Losses and exclusions                                                                         | 7                                               |
| Recruitment                 | 14a  | Periods of recruitment                                                                        | 2,3                                             |
|                             | 14b  | Reasons for stopping                                                                          | 3,4                                             |
| Participant characteristics | 15   | Baseline data table                                                                           | 6                                               |
| Denominators                | 16   | Numbers analysed                                                                              | 6, Table1                                       |
| Outcomes                    | 17a  | Effect sizes and estimations                                                                  | Tables 2-3; Figures 2-5                         |
|                             | 17b  | Binary outcomes                                                                               | Table 1; page 5                                 |
|                             | 18   | Ancillary analyses                                                                            | Tables S2-S4                                    |
| Harms                       | 19   | Adverse events                                                                                | Ref 13                                          |
| DISCUSSION<br>Limitations   | 20   | Eg Imprecision, bias                                                                          | 12,13                                           |
|                             | 21   | Internal/external validity                                                                    | 12,13                                           |
| Interpretation              | 22   | Consistency with other studies                                                                | 12                                              |
| OTHER                       | 23   | Trial registration                                                                            | 3                                               |
|                             | 24   | Availability of protocol                                                                      | On request                                      |
|                             | 25   | Funding/role of funder                                                                        | 14                                              |
